# Supplementary material
Source: publisher figshare collection journal article supplement (https://tandf.figshare.com/ndownloader/files/14504909)
Supplement: Supplementary file 1 [file 14504909]

**Annexure**


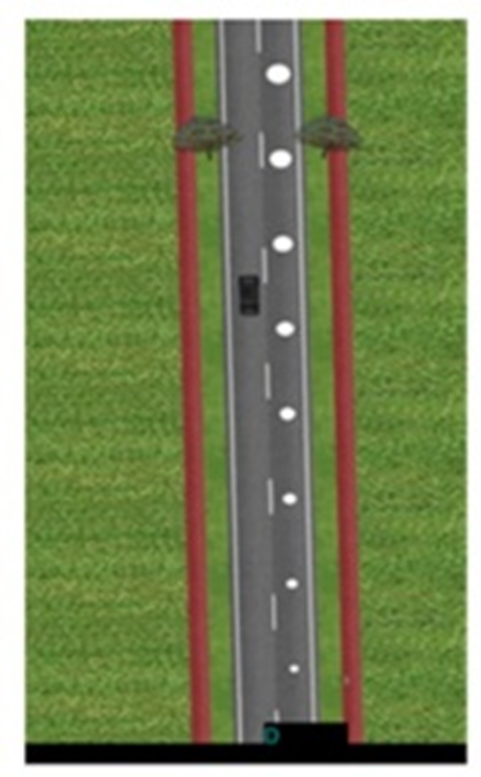


Figure A1: Top view of Optical Circles


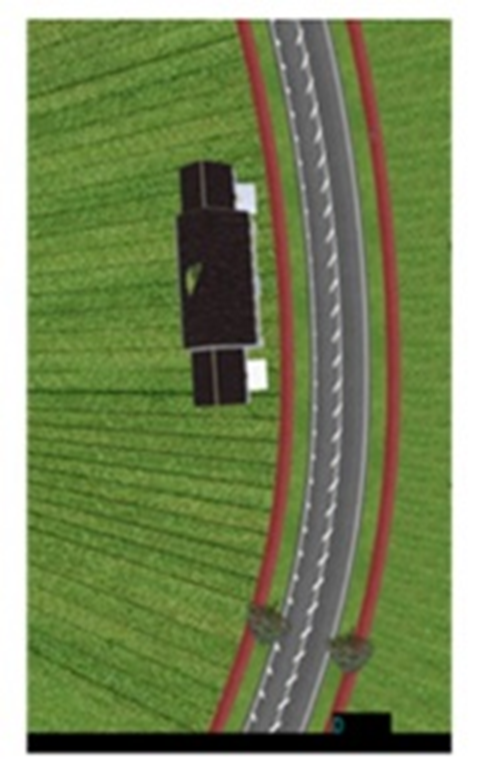


Figure A2: Top view of Herringbone


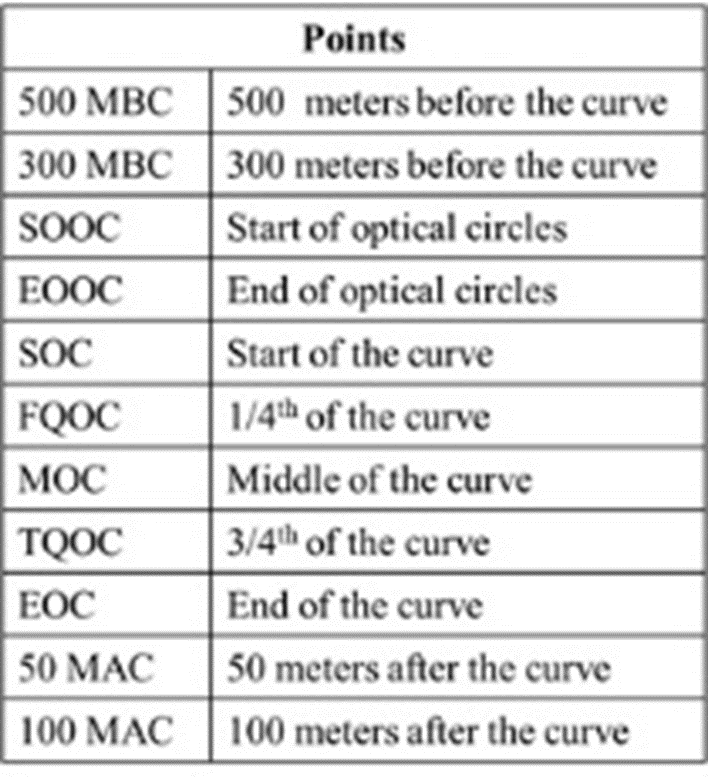


Figure A3: Description of 11 data points before, at and after the curves


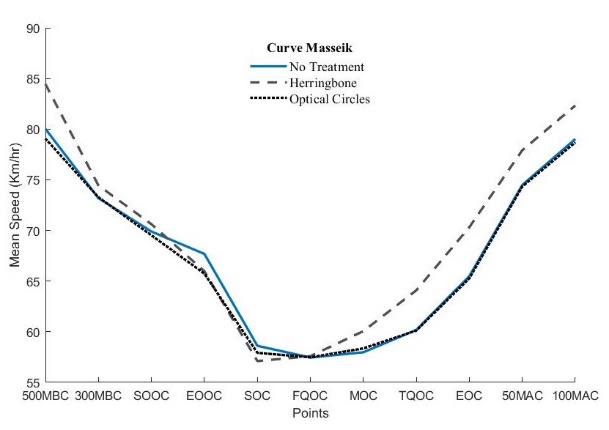


Figure A4: Mean Speed at the curve Masseik


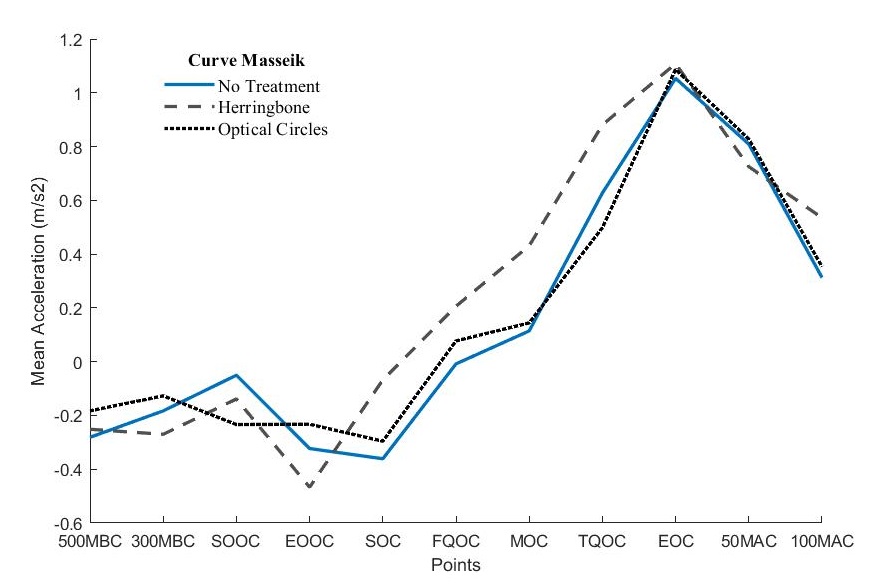


Figure A5: Mean Acceleration at the curve Masseik


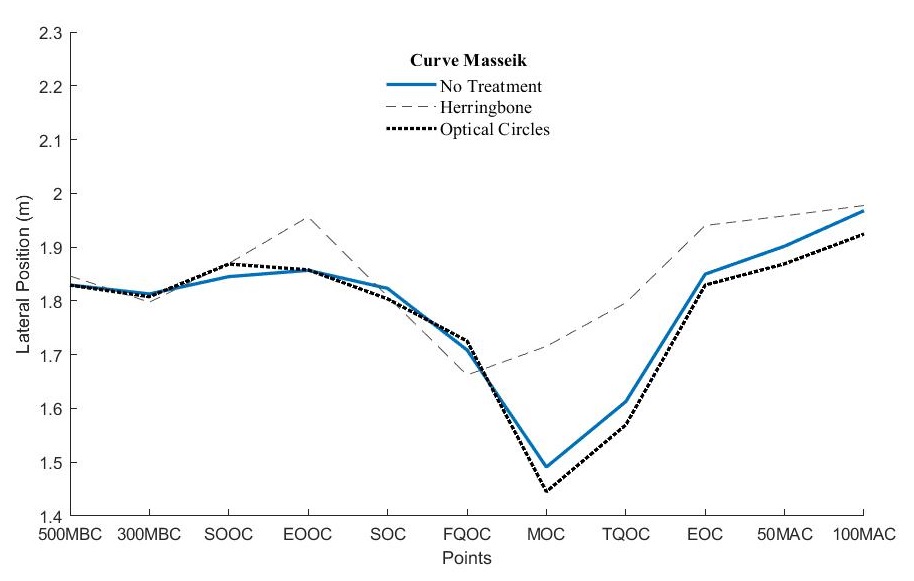


Figure A6: Lateral Position at the curve Masseik
